# Supplementary material for: Anti-high mobility group box-1 (HMGB1) antibody inhibits hemorrhage-induced brain injury and improved neurological deficits in rats
Source: PubMed Central journal article supplement (PMC5385548; doi:10.1038/srep46243), 2017-04-10
Supplement: srep46243-s1.pdf [file srep46243-s1.pdf]

# ONLINE SUPPLEMENT

## Supplementary Tables and Figures

Anti-high mobility group box-1 (HMGB1) antibody inhibits hemorrhage-induced brain injury and improved neurological deficits in rats

Dengli Wang<sup>1</sup>, Keyue Liu<sup>1</sup>, Hidenori Wake<sup>1</sup>, Kiyoshi Teshigawara<sup>1</sup>, Shuji Mori<sup>2</sup>  
and Masahiro Nishibori<sup>1\*</sup>

<sup>1</sup>Department of Pharmacology, Okayama University Graduate School of  
Medicine, Dentistry and Pharmaceutical Sciences, Okayama, Japan

<sup>2</sup>Shujitsu University, School of Pharmacy, Okayama, Japan

### Correspondence to

Masahiro Nishibori, MD, PhD.

Department of Pharmacology, Okayama University Graduate School of  
Medicine, Dentistry and Pharmaceutical Sciences, 2-5-1 Shikata-cho, Kita-ku,  
Okayama 700-8558, Japan. Tel/FAX: +81-86- 235-7140.

E-mail: mbori@md.okayama-u.ac.jp

## Supplementary table S1: Primer Sequences Used in quantitative RT-PCR

| Gene          |                                                                |
|---------------|----------------------------------------------------------------|
| INOS          | 5'-GCATCCCAAGTACGAGTGGT-3'<br>5'-GAAGTCTCGGACTCCAATCTC-3'      |
| TNF- $\alpha$ | 5'-GCCCAGACCCTCACACTC-3'<br>5'-CCACTCCAGCTGCTCCTCT-3'          |
| MMP-2         | 5'-GCACCGTCGCCCATCA-3'<br>5'-GTCTCGATGGTGTCTGGTCAA-3'          |
| MMP-9         | 5'-GAGGATCCGCAGTCCAAGAA-3'<br>5'-GCACCGTCTGGCCTGTGTA-3'        |
| COX-2         | 5'-TGTATGCTACCATCTGGCTTCGG-3'<br>5'-GTTTGGAACAGTCGCTCGTCATC-3' |
| IL-6          | 5'-CAAAGCCAGAGTCATTGAGAGC-3'<br>5'-GGAGAGCATTGGAAGTTGGG-3'     |
| VEGF-121      | 5'-CTCACCAAAGCCAGCACATA-3'<br>5'-GCCTTGGCTTGTCACATT-3'         |
| IL-8R         | 5'-CATCCTGCCTCAGACCTATGG-3'<br>5'-AAGACGAGGACCACAGCAAAG-3'     |
| GAPDH         | 5'-AGCCCAGAACATCATCCCTG-3'<br>5'-CACCACCTTCTTGATGTCATC-3'      |
| IL-1 $\beta$  | 5'-CACCTTCTTTTCCTTCATCTTTG-3'<br>5'-GTCGTTGCTTGTCTCTCCTTGTA-3' |
| AT-1R         | 5'-ACCAGGTCAAGTGGATTTCCG-3'<br>5'-ATCACCAAGCTGTTTCC-3'         |
| PAR-1         | 5'-GTTGGATAGTGGGCCGTAGA-3'<br>5'-TTAGCTGATAGGCCGTGCTT-3'       |
| $\alpha$ -1R  | 5'-GAATGTCCTGCGAATCCAGT-3'<br>5'-GATTGGTCCTTTGGCACTGT-3'       |
| V1R           | 5'-GGTCGTCTTGGGTACATGCT-3'<br>5'-TCTTCACAGTGCGGATCTTG-3'       |
| TxA2          | 5'-AGGAGCCTGAATGTTTGGTG-3'<br>5'-TGAGACAGACGCGGACTATG-3'       |
| eNOS          | 5'-TGACCCTCACCGATAACAACA-3'<br>5'-CTGGCCTTCTGCTCATTTTC-3'      |
| IL-10         | 5'-CCTCTGGATACAGCTGCGAC-3'<br>5'-CATTCATGGCCTTGAGACACC-3'      |
| HMGB1         | 5'-TTGTCCACACACCCTGCATA-3'<br>5'-AATTGATCACTCCTTGCTTTGCT-3'    |
| TLR2          | 5'-GACTCAAGAGCATCGGCTGG-3'<br>5'-CAGAATGGCCTTCCCTTGAGA-3'      |
| TLR4          | 5'-CTCACAACTTCAGTGGCTGG-3'<br>5'-GGGTTTCCTGTCAGTACCAAGG-3'     |
| RAGE          | 5'-CTGAGGTAGGGCATGAGGATG-3'<br>5'-GCCTGCAGCTTGTCCTTCAT-3'      |

**a**

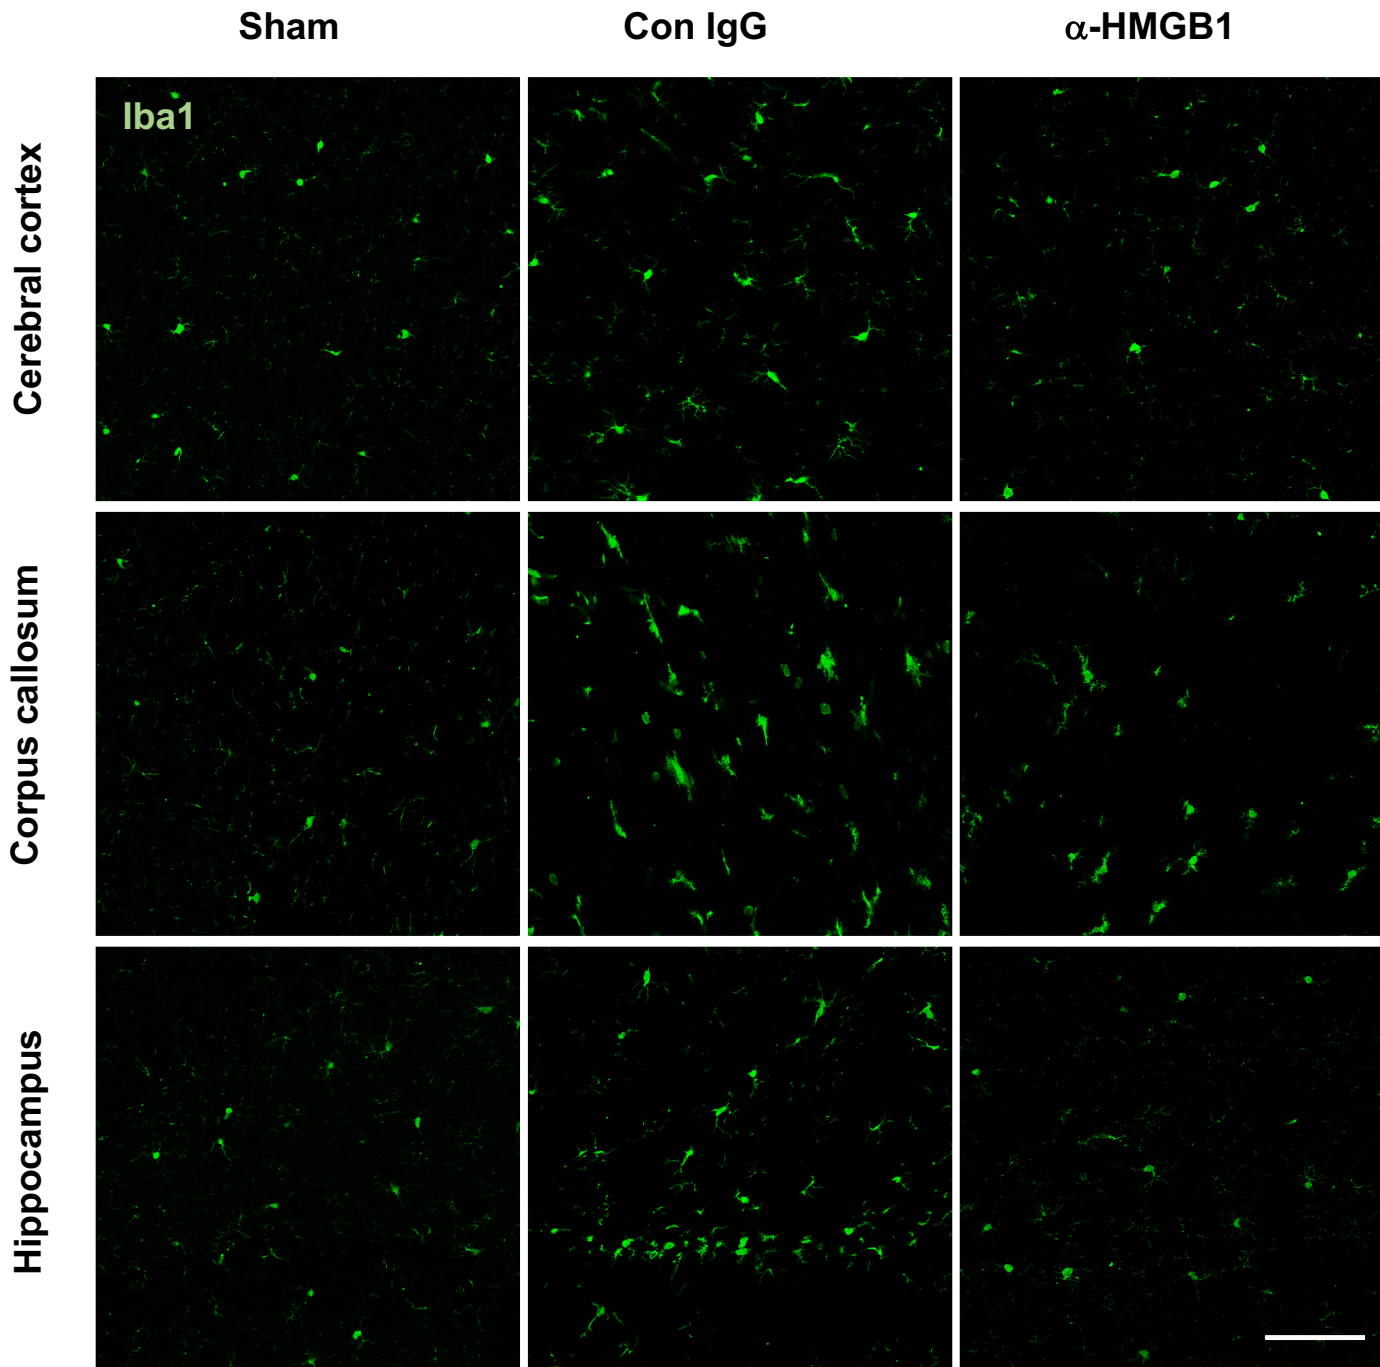

**Supplementary Fig. S1a: The expression of Iba1 in the cerebral cortex, corpus callosum and hippocampus 24 h after ICH.** The Iba1-immunoreactive cells were observed in the cerebral cortex, corpus callosum, striatum (perihematoma region) and hippocampus 24 h after ICH. A representative image from 3-6 rats is shown in each group. The scale bar represents 100  $\mu$ m.

# Suppl. S1b

## b cortex

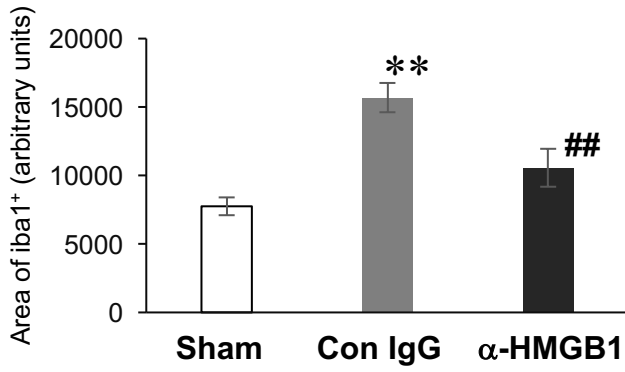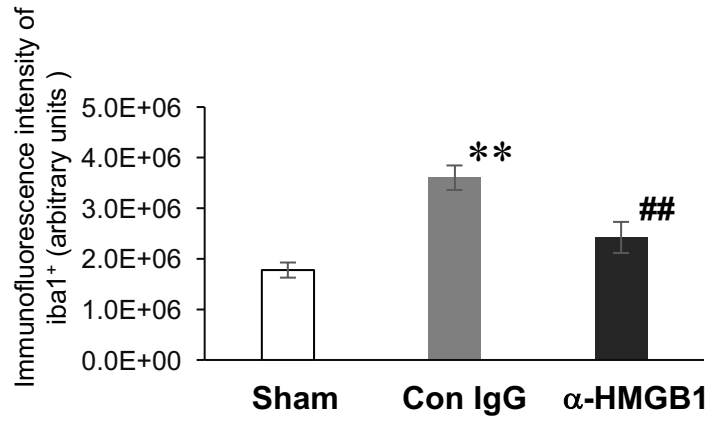

## Corpus callosum

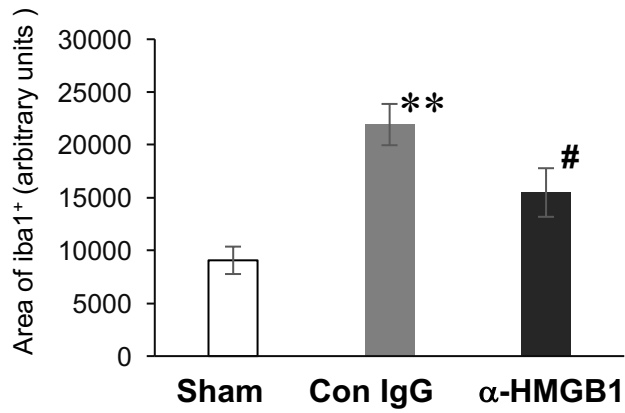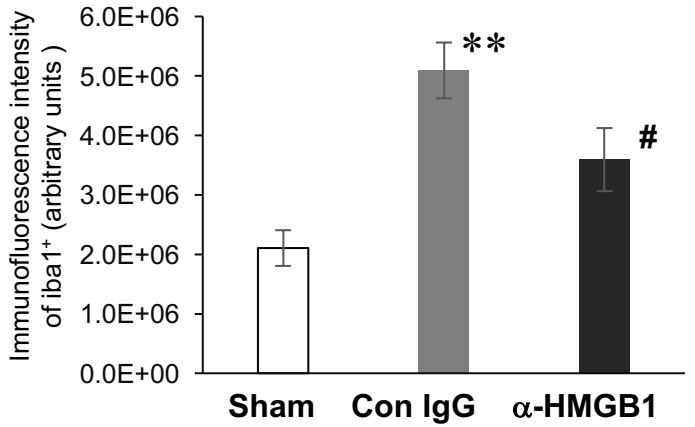

## Hippocampus

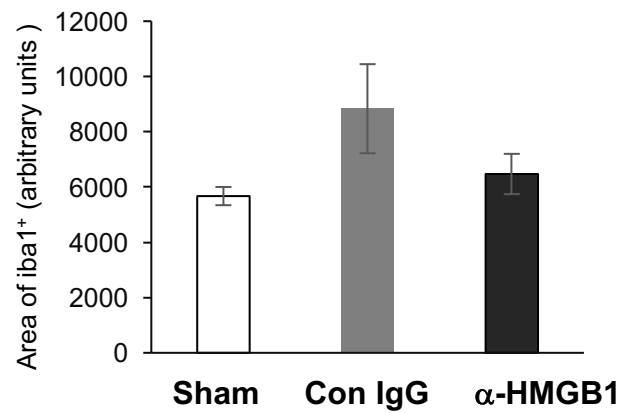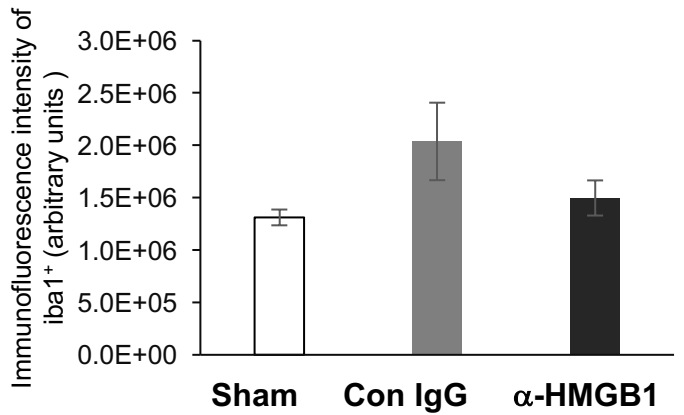

**Supplementary Fig. S1b: Quantification of immunoreactive area and immunofluorescence intensity for Iba1.** The immunoreactive area for Iba1 and immunofluorescence intensity at a constant size were measured in each rat and the results are expressed as the means  $\pm$  SEM of 4-6 rats.  $F_{(2,11)}=4.996$ ,  $p=0.029$ ;  $F_{(2,11)}=5.426$ ,  $p=0.023$  for cortex.  $F_{(2,13)}=12.607$ ,  $p<0.001$ ;  $F_{(2,13)}=12.448$ ,  $p<0.001$  for corpus callosum.  $F_{(2,10)}=1.819$ ,  $p=0.212$ ;  $F_{(2,10)}=1.811$ ,  $p=0.213$  for hippocampus. \*\* $p < 0.01$  compared with the sham groups. # $p < 0.01$ , # $p < 0.05$  compared with the control IgG-treated group.

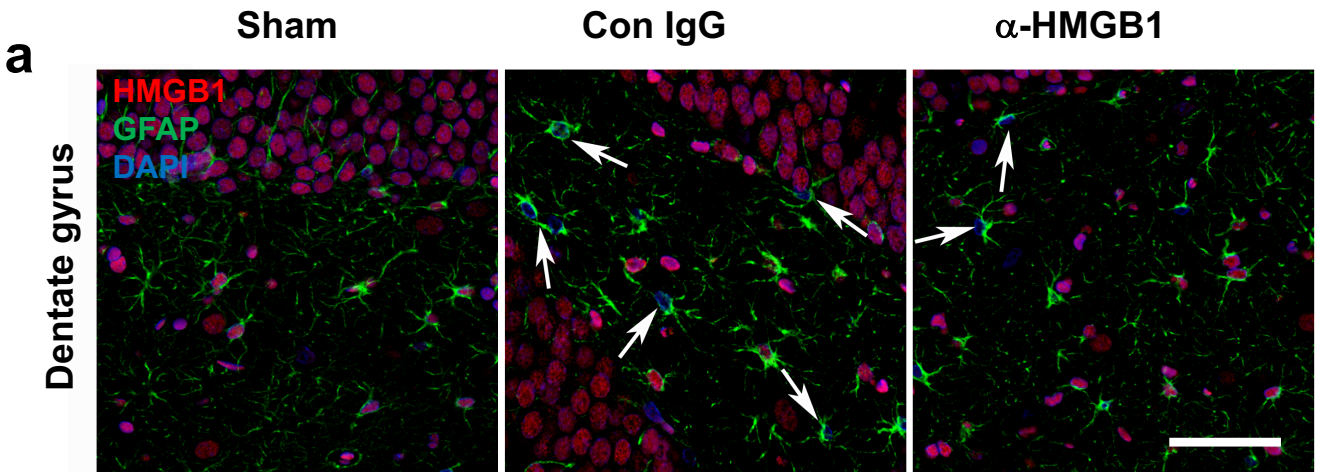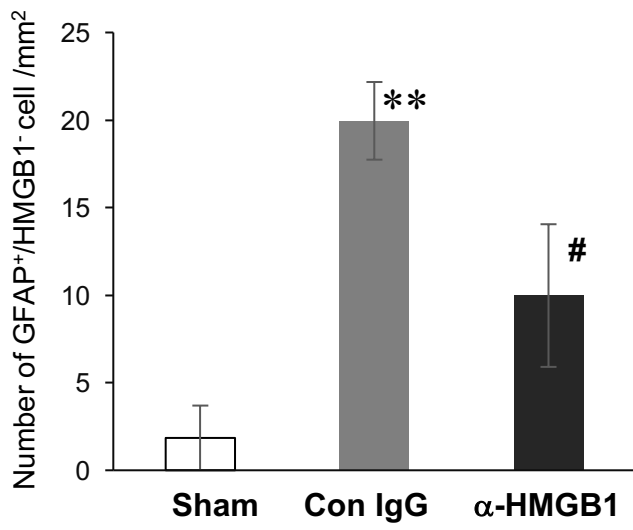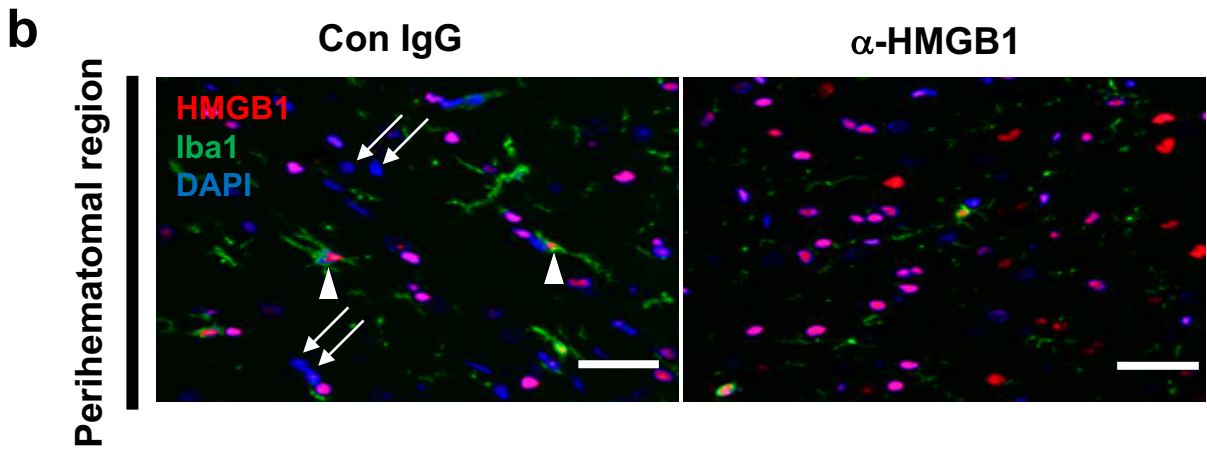

**Supplementary Fig. S2: Double immunohistochemical staining for HMGB1 and GFAP in the dentate gyrus and immunofluorescence experiments of microglia activation and HMGB1 expression in the ICH brain.** **a** Double immunohistochemical staining for HMGB1 and GFAP in the dentate gyrus was performed 24 h after ICH. The white arrows indicate HMGB1-negative astrocytes. The scale bars represent 50  $\mu$ m. The number of these cells was counted in each group and the results are expressed as the means  $\pm$  SEM of 3-5 rats.  $F_{(2,10)}=7.168$ ,  $p=0.012$ . **\*\*** $p < 0.01$  compared with the sham groups. **#** $p < 0.05$  compared with the control IgG-treated group. **b** Activated microglia in the peri-hematoma region was detected by Iba1 staining. White arrowheads show Iba1-strong positive activated microglia. Arrows indicate the DAPI-positive but HMGB1-negative cells. The scale bar represents 50  $\mu$ m.

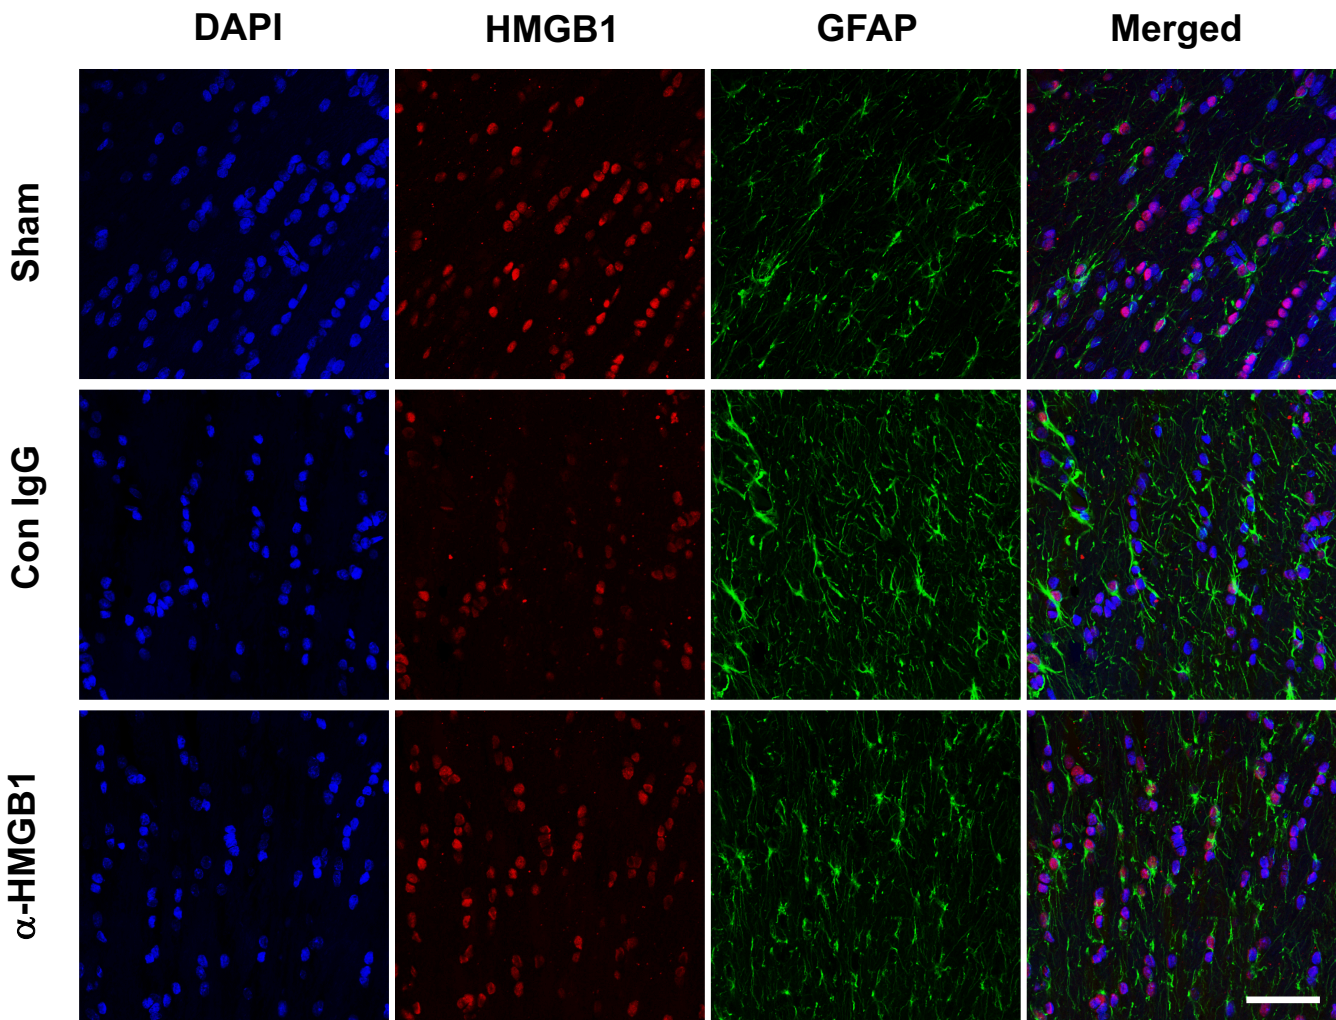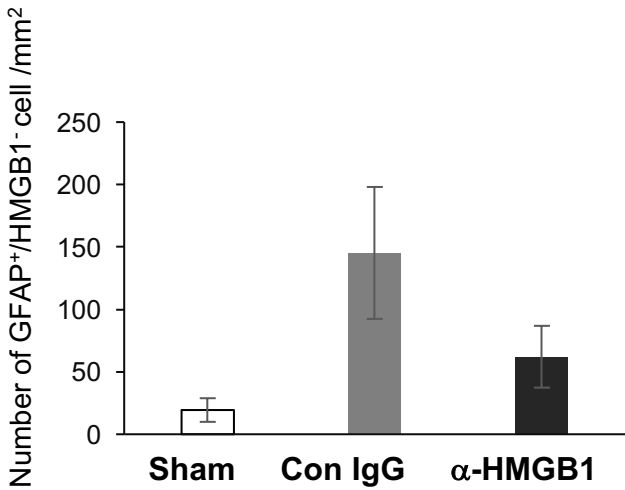



**Supplementary Fig. 3 The translocation of HMGB1 from astrocytes in the corpus callosum 24 h after ICH.** Double immunohistochemical staining for HMGB1 and GFAP in the corpus callosum was performed 24 h after ICH. Most of the GFAP-positive astrocytes in the control IgG group were negative for HMGB1, whereas those in the anti-HMGB1 group retained HMGB1 in their nuclei. The scale bar represents 50  $\mu\text{m}$ . The ratio of HMGB1-negative astrocytes to total astrocytes in corpus callosum are expressed as the means  $\pm$  SEM of 4-5 rats.  $F_{(2,11)}=2.988$ ,  $p=0.092$ .

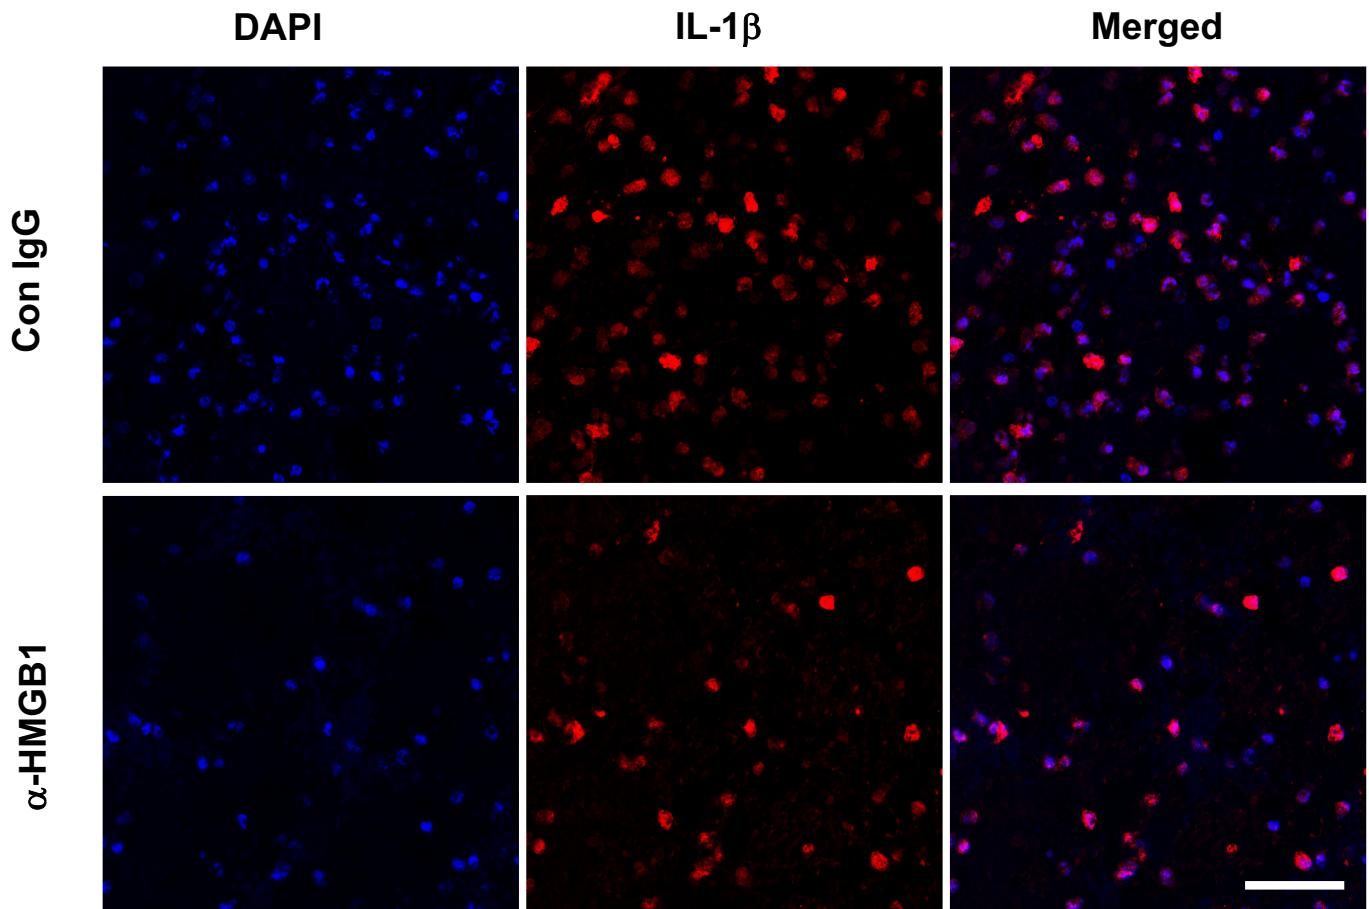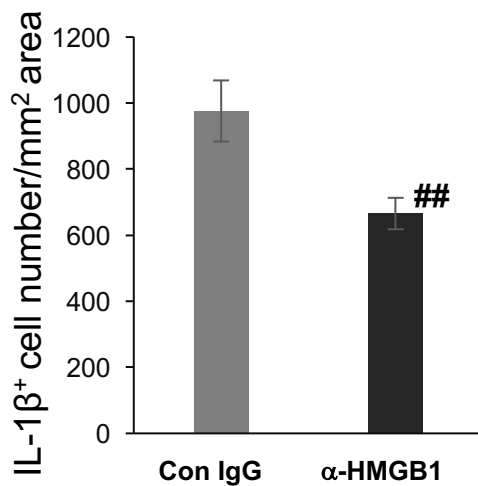

**Supplementary Fig. S4 Effect of anti-HMGB1 on IL-1 $\beta$  immunoreactivities within the hemorrhagic region at 24 h after ICH.** IL-1 $\beta$  immunoreactivities were detected within the hemorrhagic region at 24 h after ICH. The scale bars represent 50  $\mu$ m. The total cell number was counted in two groups and the results are expressed as the means  $\pm$  SEM of 5 rats. ##p < 0.01 compared to the control IgG group.

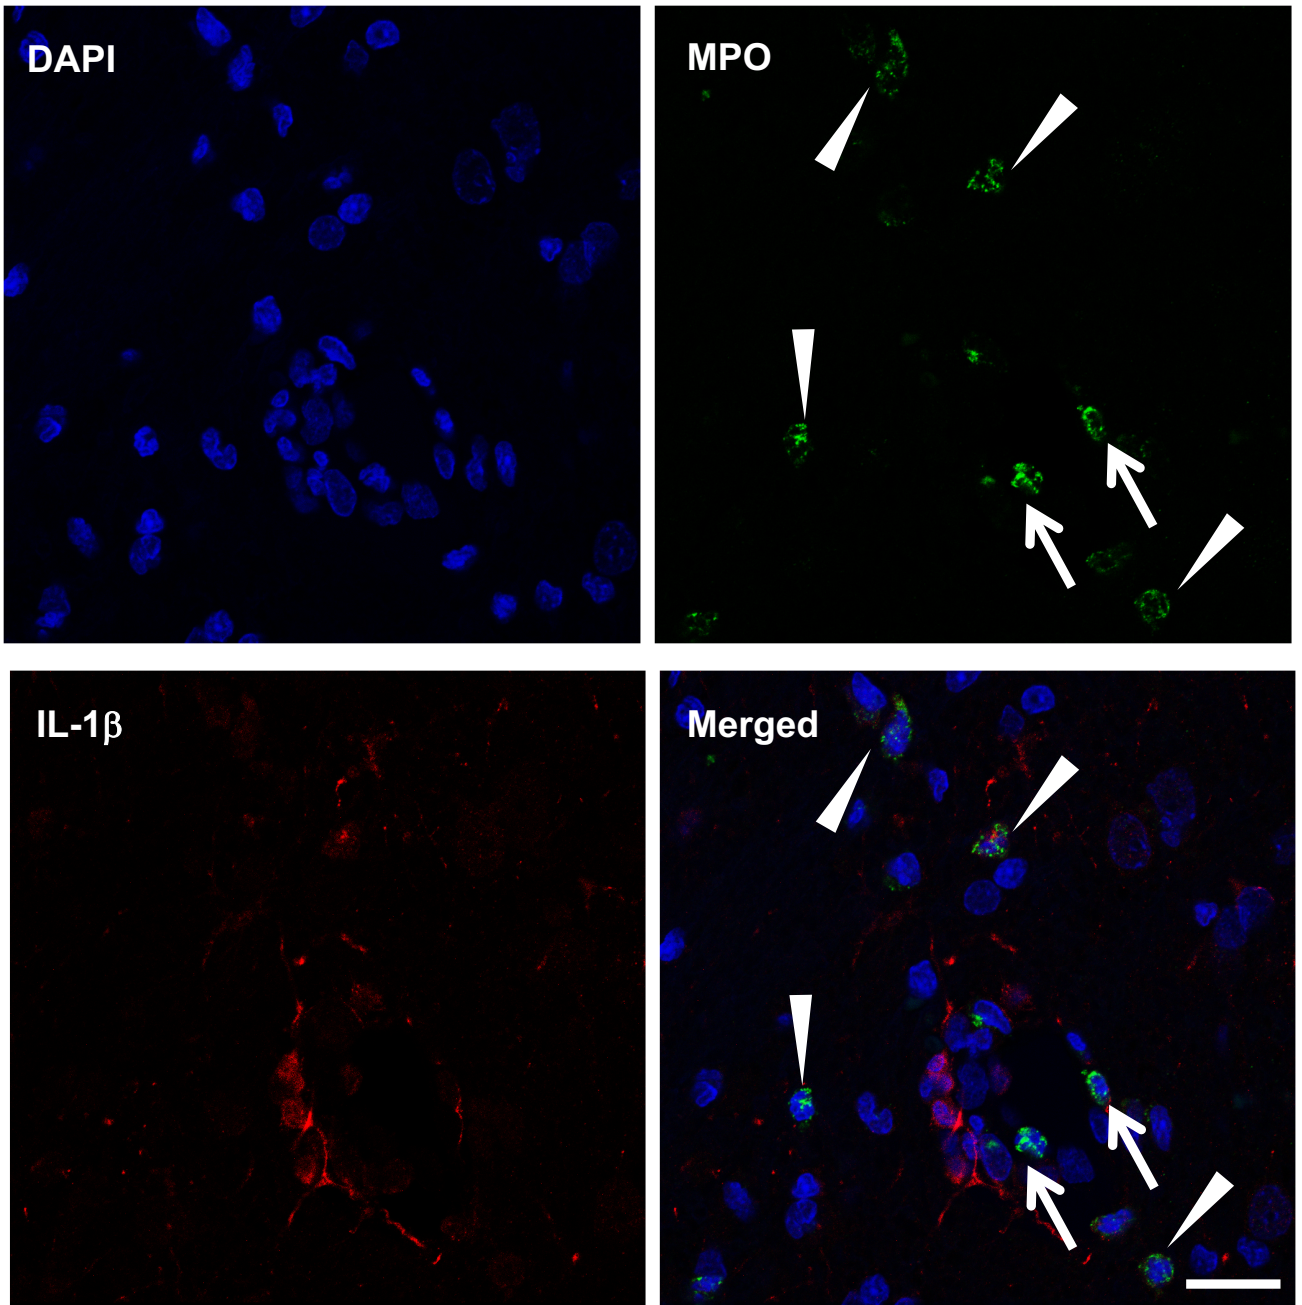

**Supplementary Fig. S5:** A representative image of a vessel in the perihematomal region. MPO<sup>+</sup> cells existed inside and outside the blood vessel. IL-1β<sup>+</sup> astrocytic processes surrounding and embracing the blood vessel. Arrows indicate the MPO<sup>+</sup> cells inside the vessel. Arrowheads indicate MPO<sup>+</sup> cells outside the vessel. The scale bar represents 20 μm.

**a**

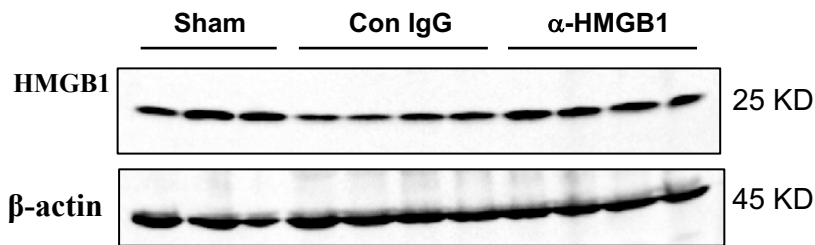

**b**

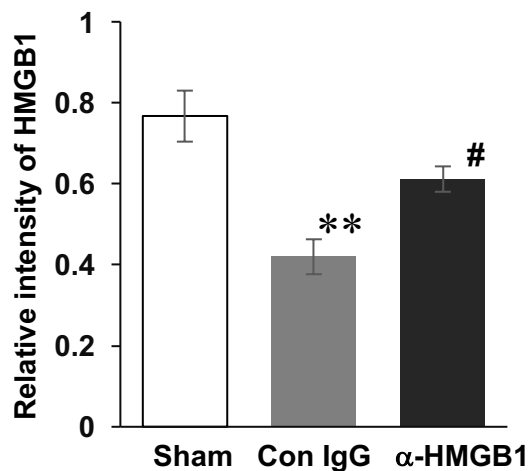

**c**

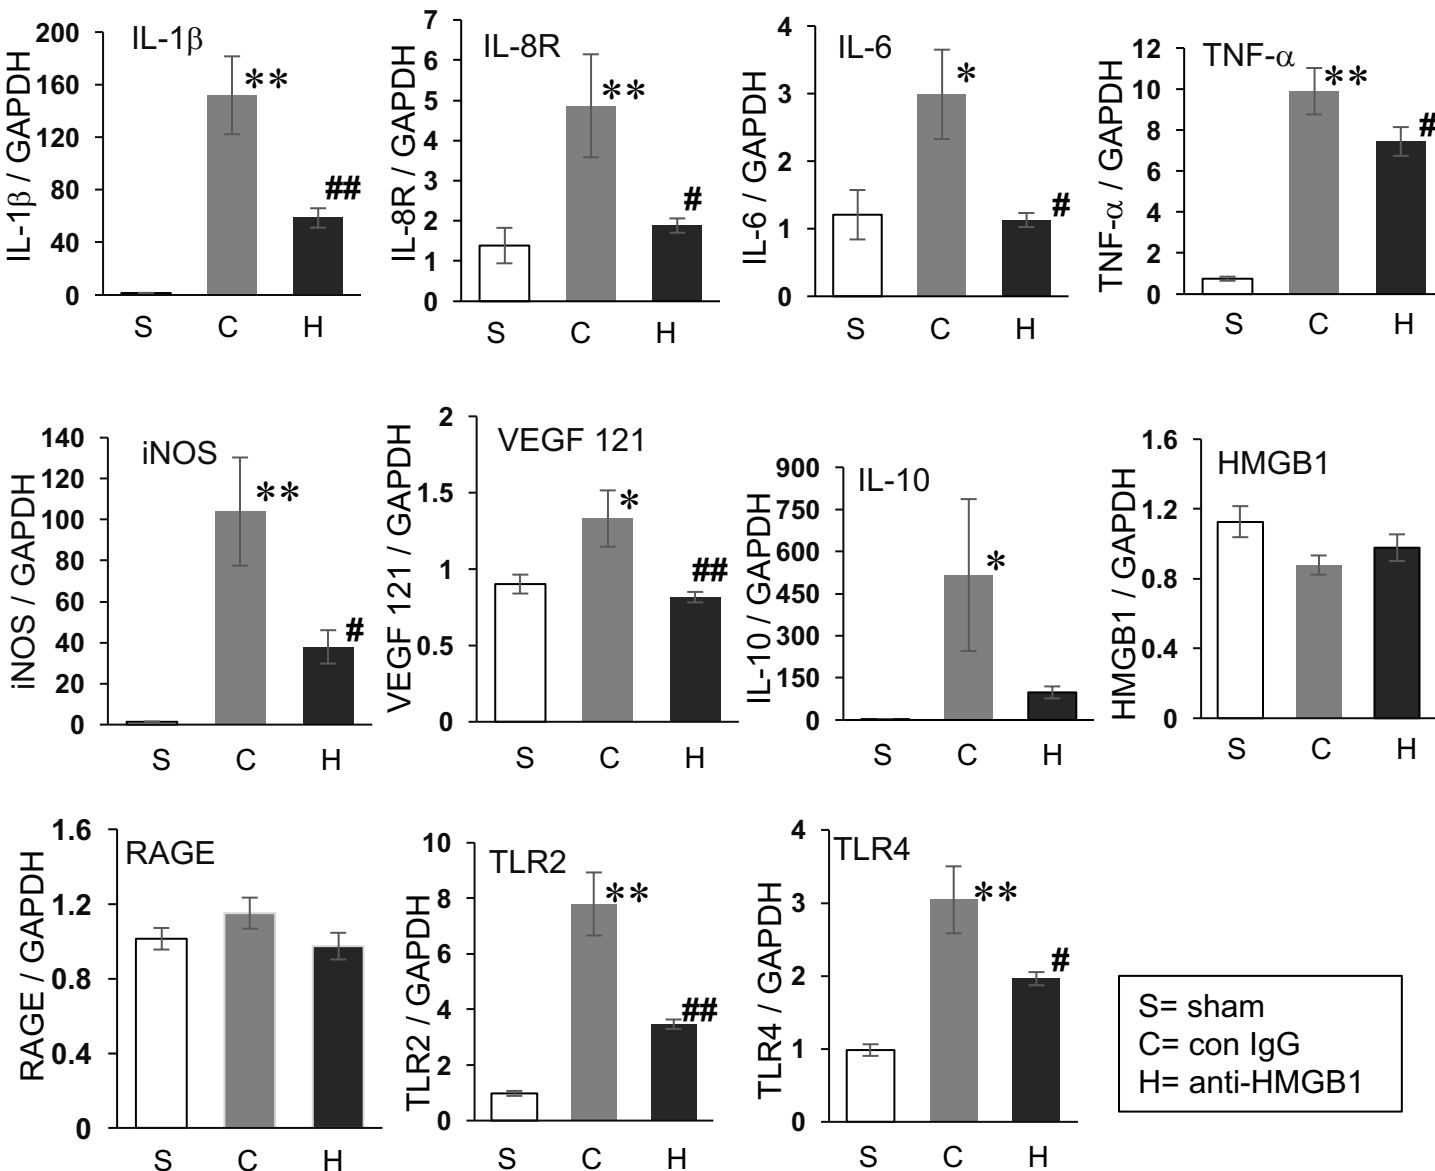

**Supplementary Fig. S6 Evaluation of the effects of anti-HMGB1 mAb treatment with regard to the therapeutic time window.** The treatment of anti-HMGB1 (1mg/kg) or control mAb was given at both 3 h and 6 h after ICH induction. **a** Cerebral bleeding areas with a volume of 3 x 3 x 3 mm<sup>3</sup> (as indicated by the white square in Fig1a) were sampled at 24 h after ICH for western blotting to determine brain HMGB1 levels. The representative results of western blotting are shown. **b** Quantitative analyses of the western blotting results were performed using NIH Image J software. The results are expressed as the means  $\pm$  SEM of 3-4 rats.  $F(2,8)=14.589$ ,  $p=0.002$  \*\* $p < 0.01$  compared with the sham group. # $p < 0.05$  compared with the control IgG-treated group. **c** mRNA expression was measured by quantitative real-time PCR in the ipsilateral (injured) striatum at 24 h after ICH. F value for each result was shown below as IL-1 $\beta$  ( $F_{(2,12)}=18.557$ ,  $p<0.001$ ), IL-8R ( $F_{(2,12)}=5.682$ ,  $p=0.018$ ), TNF- $\alpha$  ( $F_{(2,12)}=37.675$ ,  $p<0.001$ ), iNOS ( $F_{(2,12)}=10.630$ ,  $p=0.002$ ), IL-6 ( $F_{(2,12)}=5.713$ ,  $p=0.018$ ), VEGF121 ( $F_{(2,12)}=5.875$ ,  $p=0.017$ ) RAGE ( $F_{(2,12)}=1.6762$ ,  $p=0.228$ ), TLR2 ( $F_{(2,12)}=26.971$ ,  $p<0.001$ ), TLR4 ( $F_{(2,12)}=14.136$ ,  $p<0.001$ ), IL-10: ( $F_{(2,12)}=3.204$ ,  $p=0.077$ ) HMGB1 ( $F_{(2,12)}=2.795$ ,  $p=0.101$ ). The results are expressed as the means  $\pm$  SEM of 5 rats. \* $p < 0.05$ , \*\* $p < 0.01$  compared with the sham groups. # $p < 0.05$ , ## $p < 0.01$  compared with the control IgG-treated group.
